# Supplementary material for: Waste Matters: Exploring the Connection between Urban Bird Species and Solid Waste in Gujranwala
Source: Research Square preprint supplement (doi:10.21203/rs.3.rs-6205872/v1), 2025-04-01
Supplement: Supplementary file 1 [file bf522370f107aeebfac39937.docx]

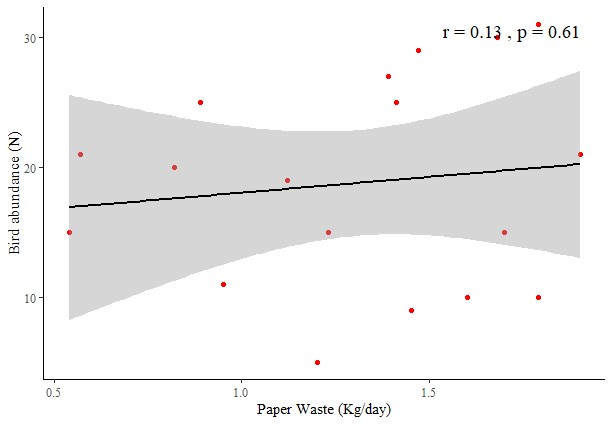


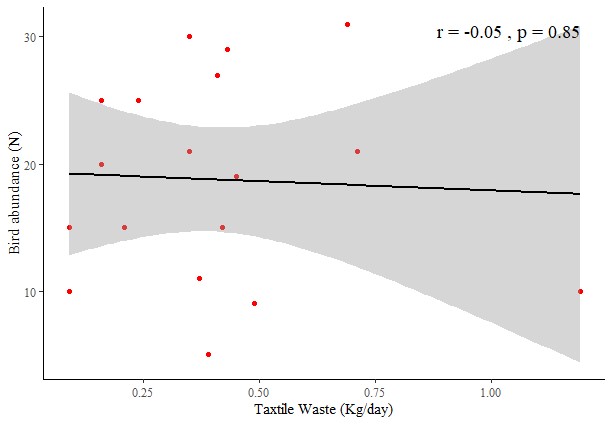


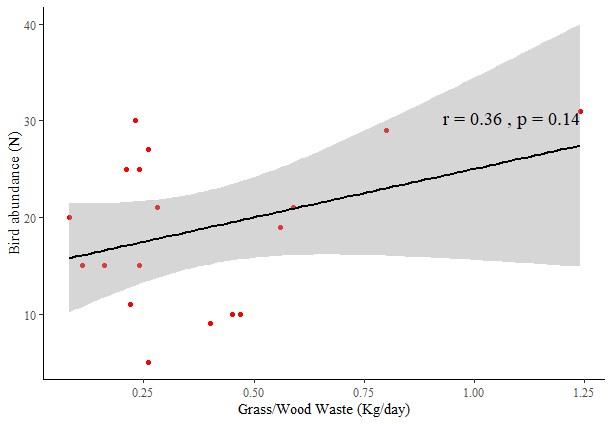


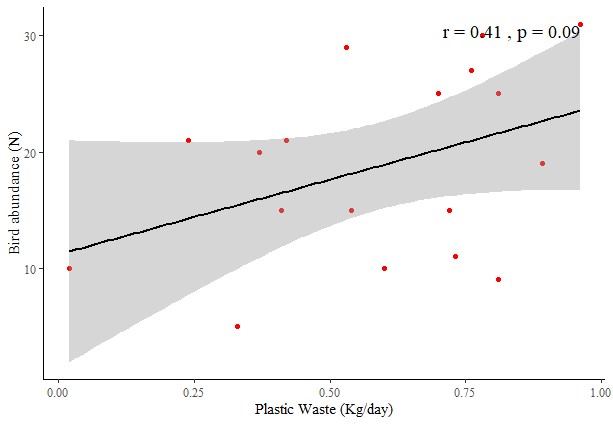


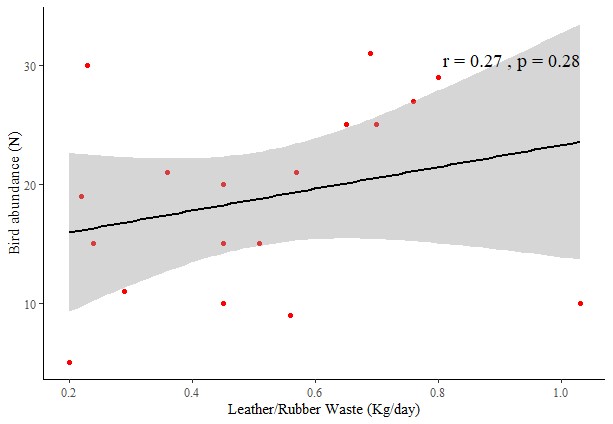


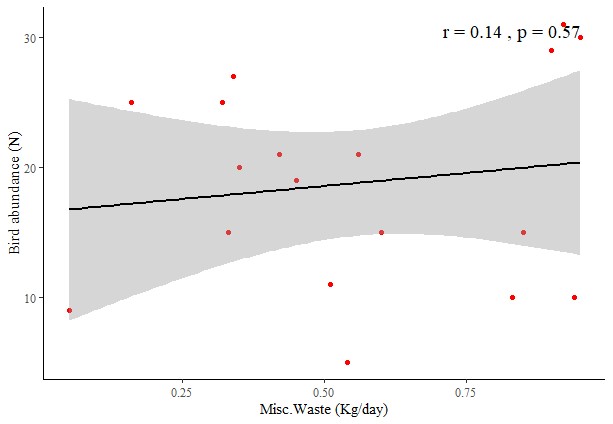


Appendix I: Non-significant relationship of avian abundance with various non-food wastes generated within the urban area.


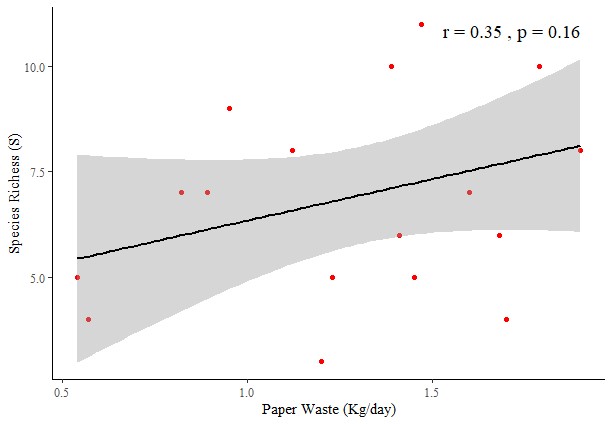


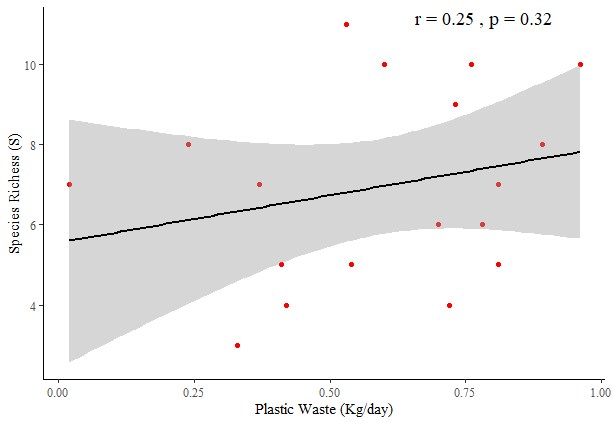


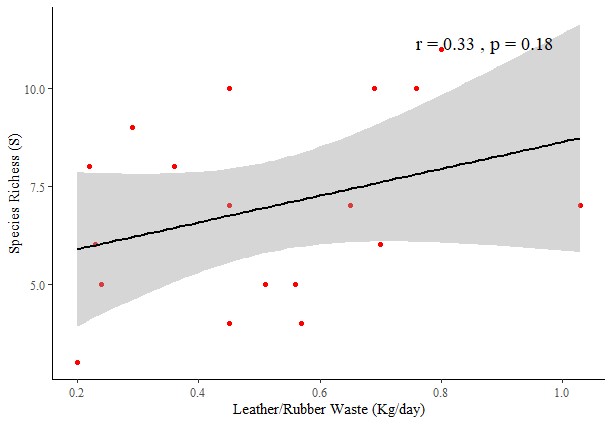


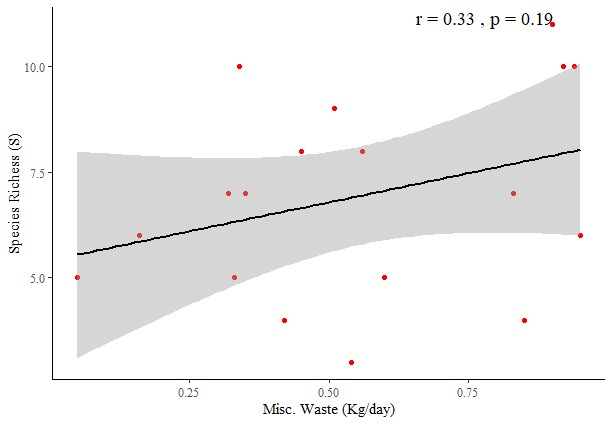


Appendix II: Relationship of species richness, with non-food wastes generated within the urban area.


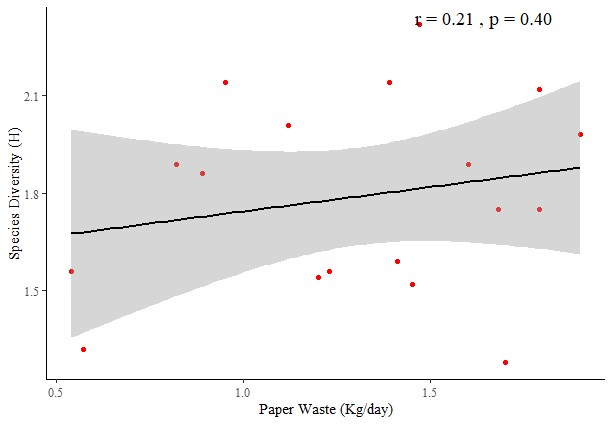


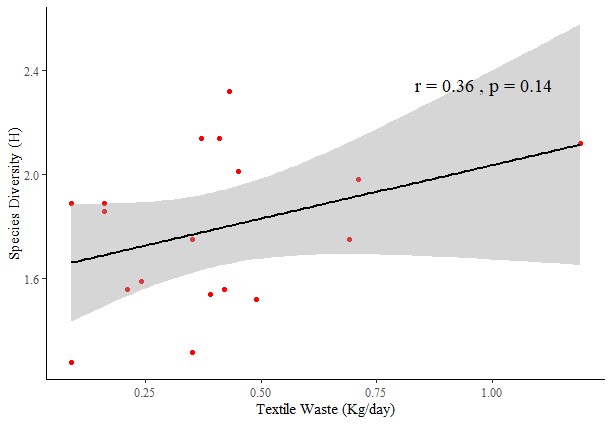


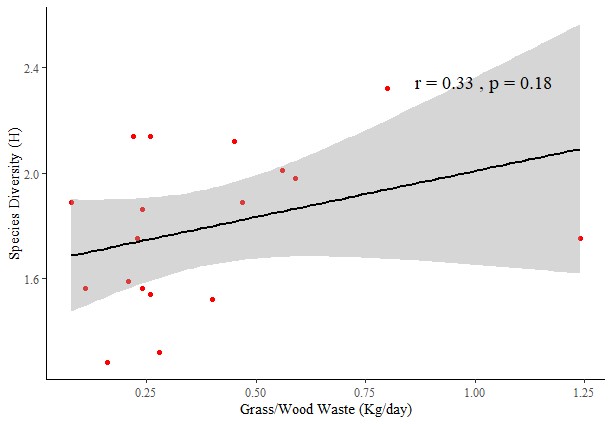


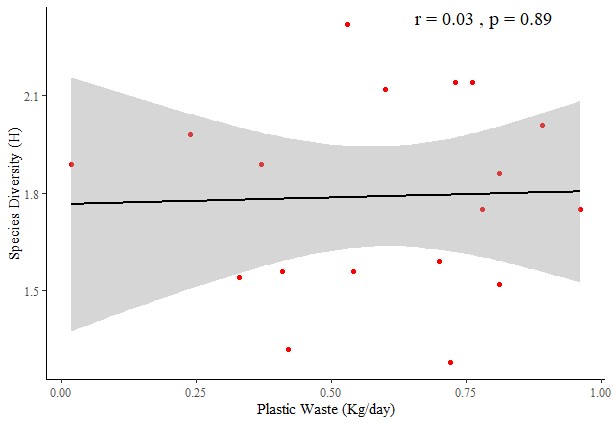


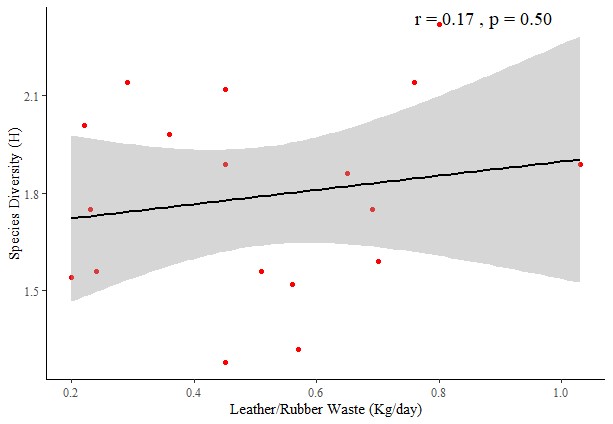


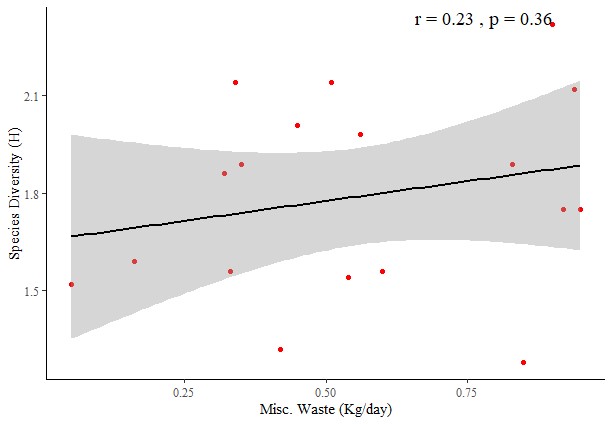


Appendix III: Relationship of avian diversity with non-food waste generated within the urban area.


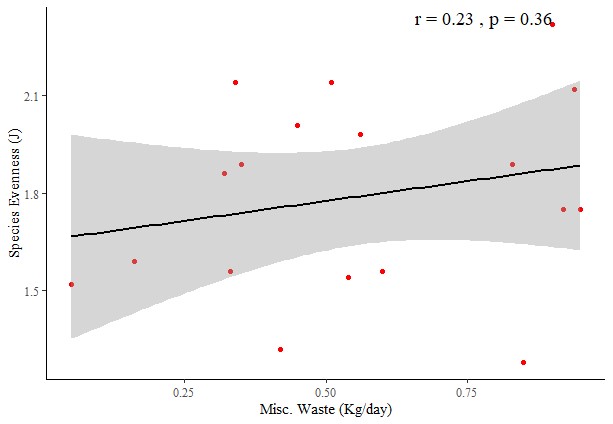


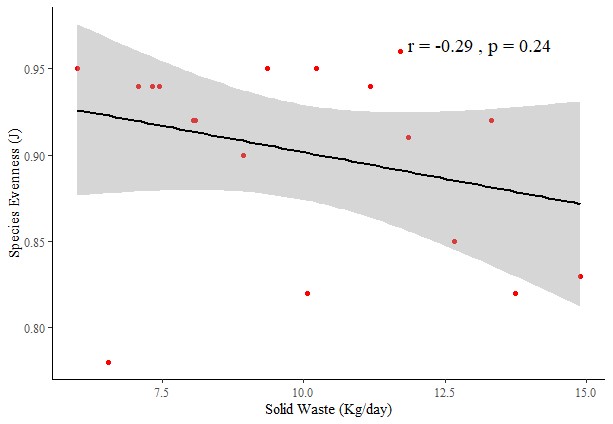


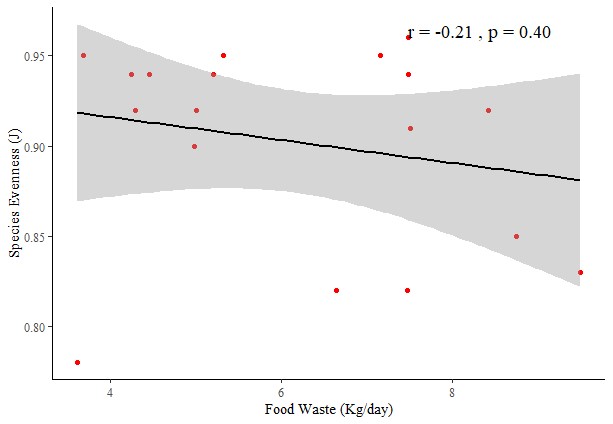


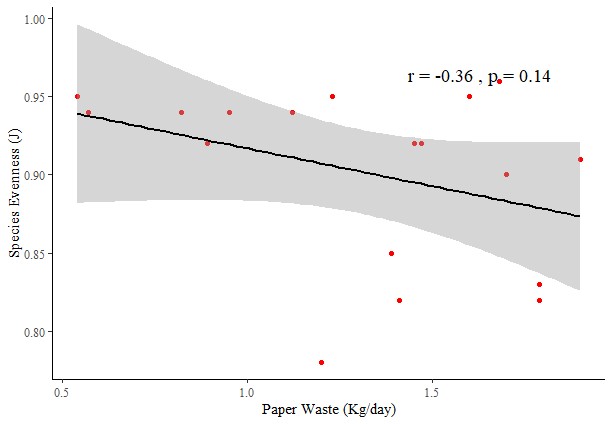


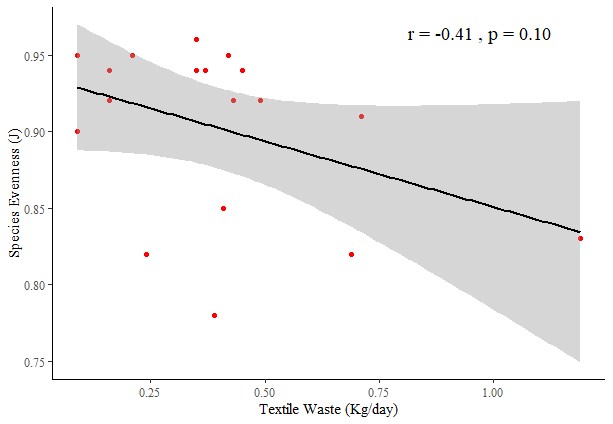


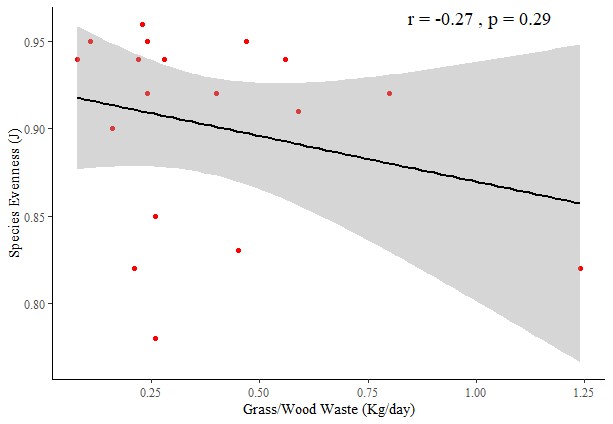


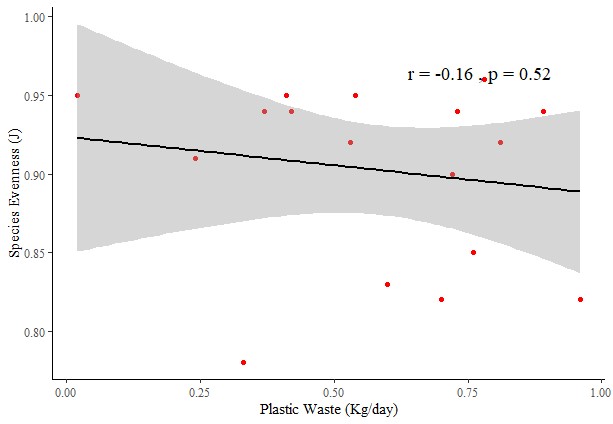


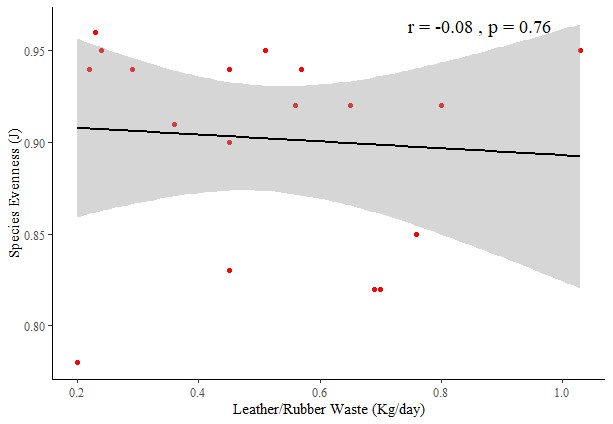


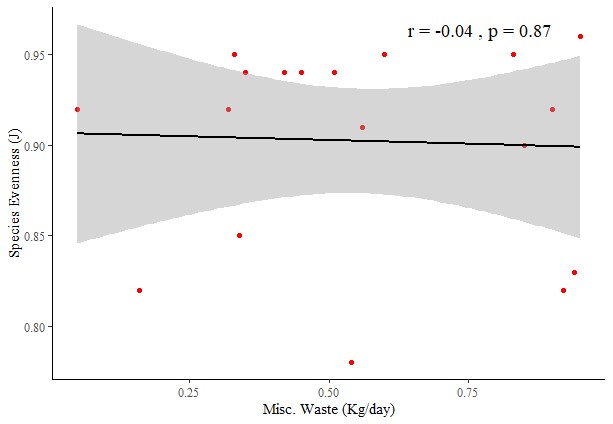


Appendix IV: Relationship of species evenness with various components of solid waste generated within the urban area.


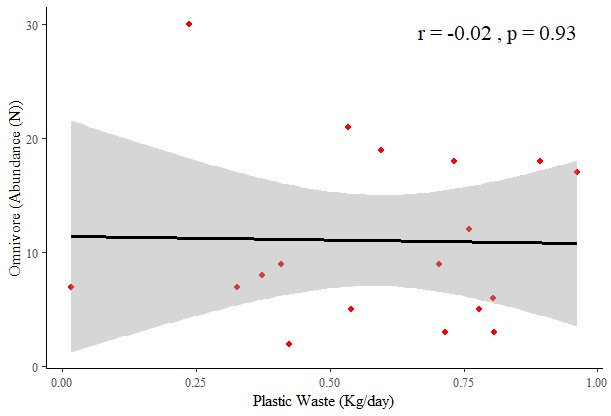


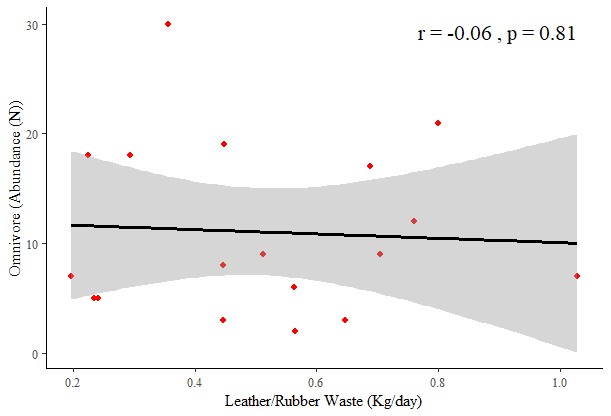


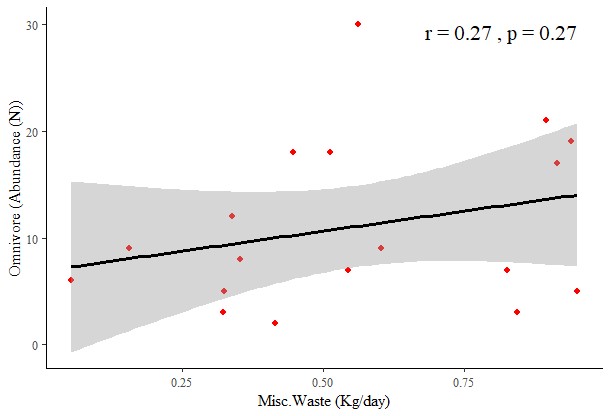


Appendix V: Relationship of omnivore abundance with various non-food waste generated within the urban area.


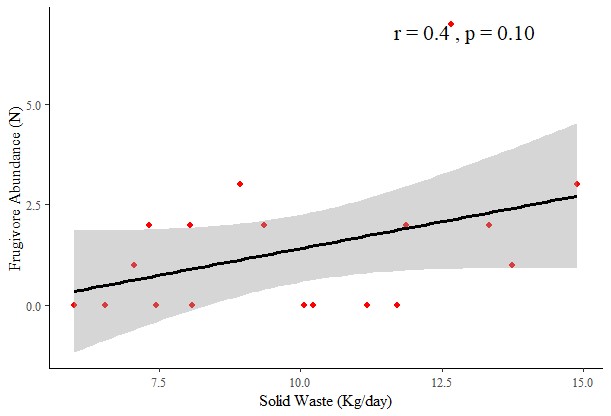


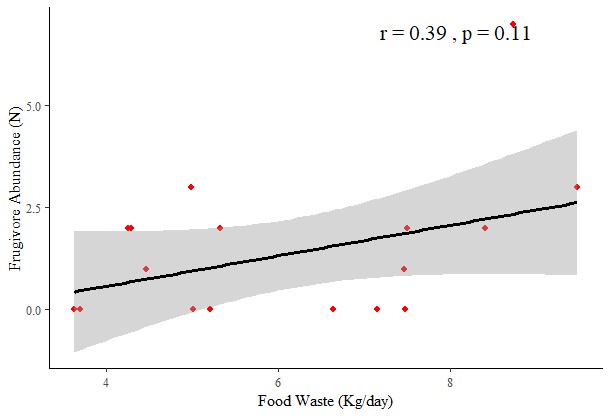


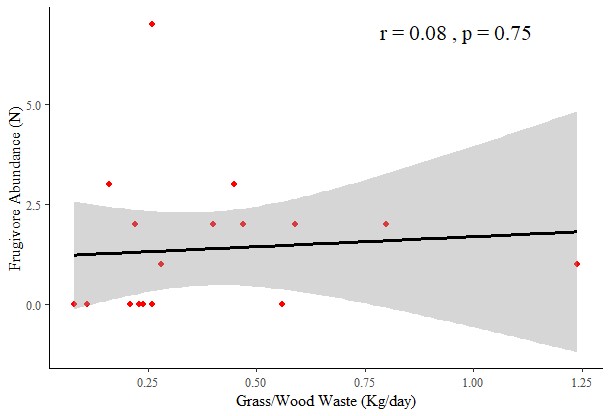


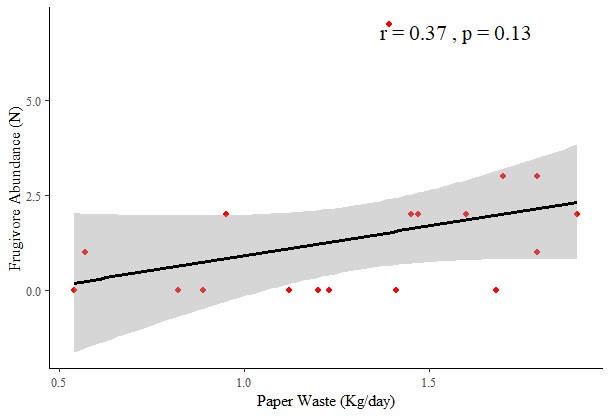


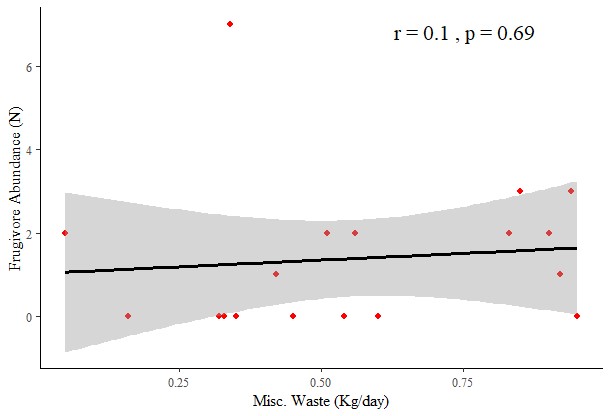


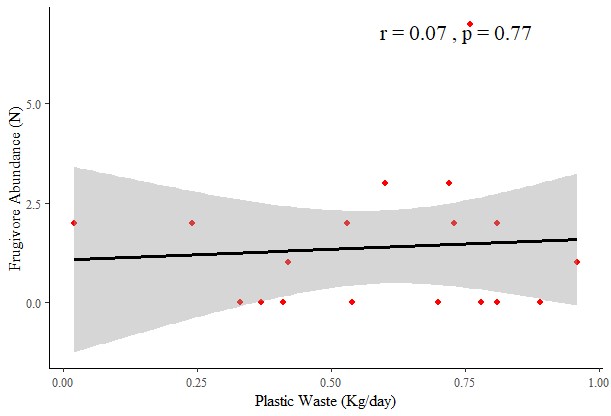


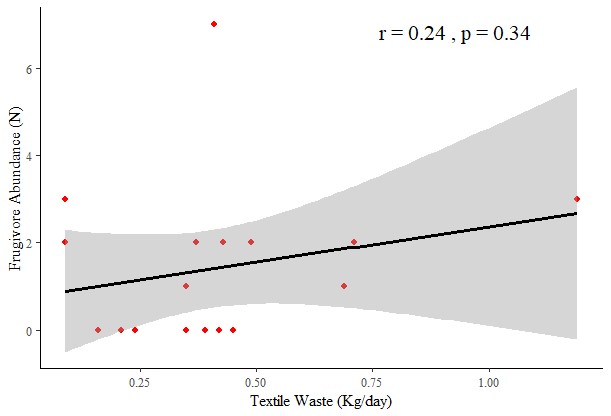


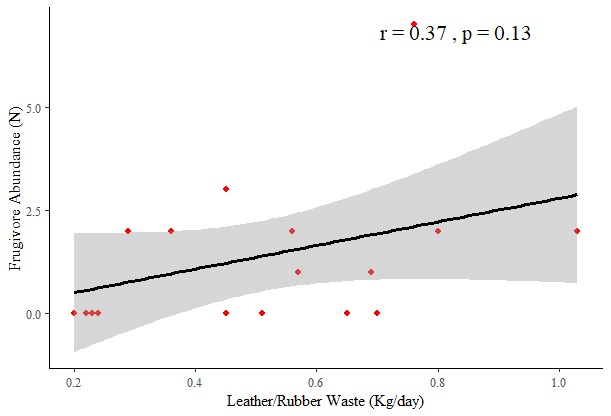


Appendix VI: Relationship of frugivorous abundance with various solid waste generated within the urban area.


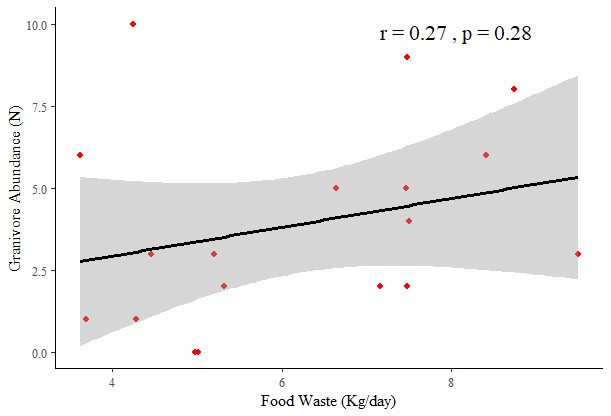


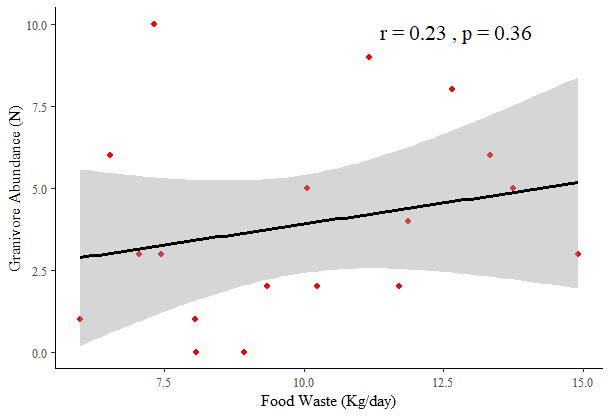


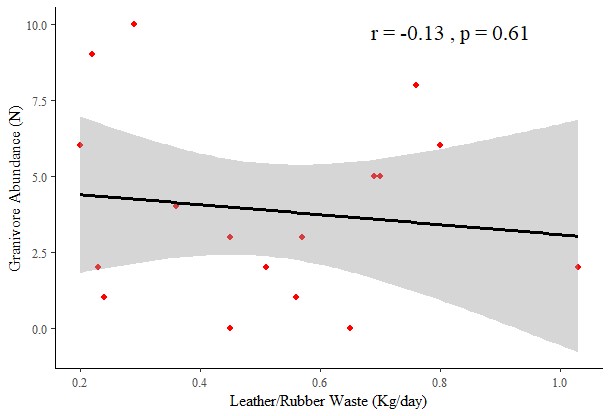


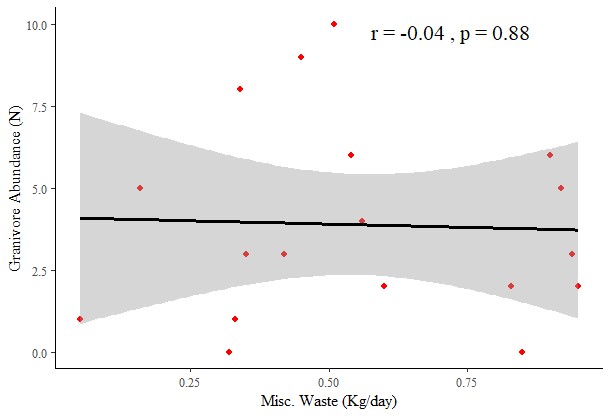


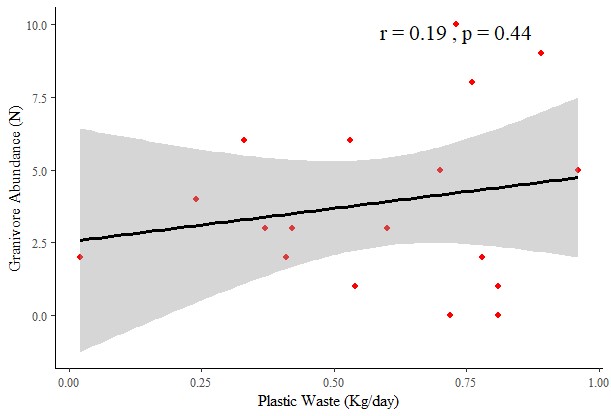


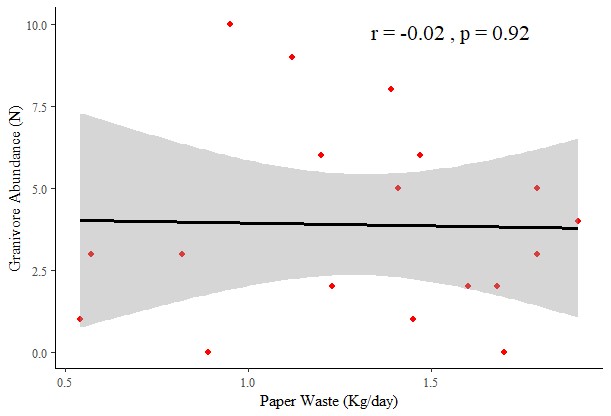


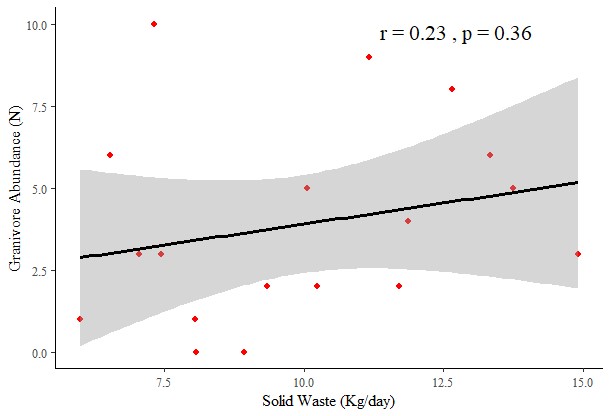


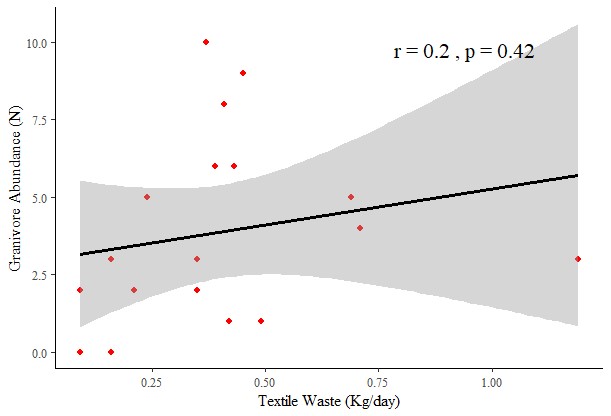


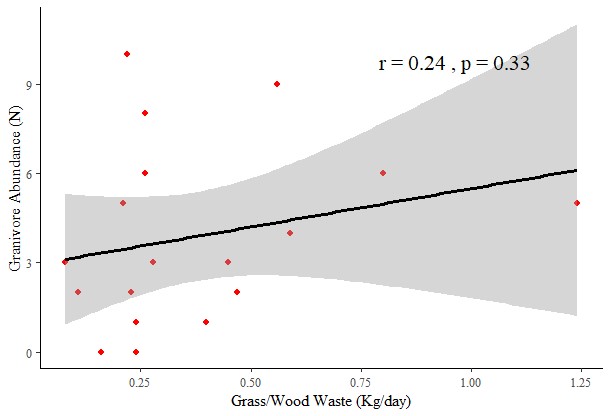


Appendix VII: Relationship of granivore abundance with various solid waste generated within the urban area during November 2014.


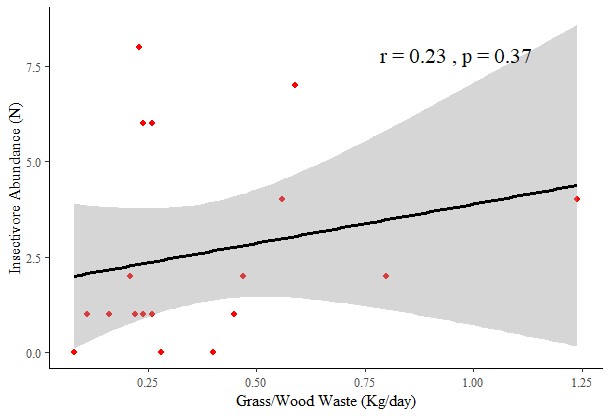


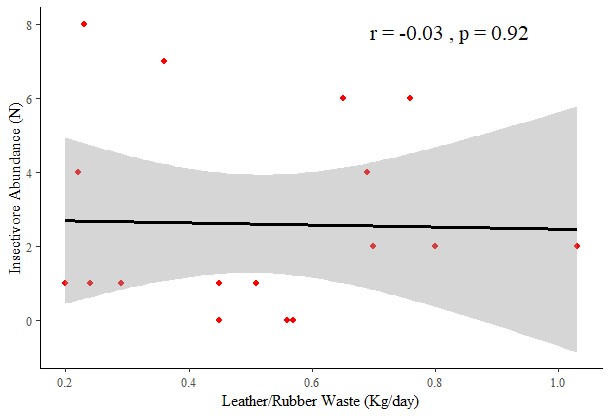


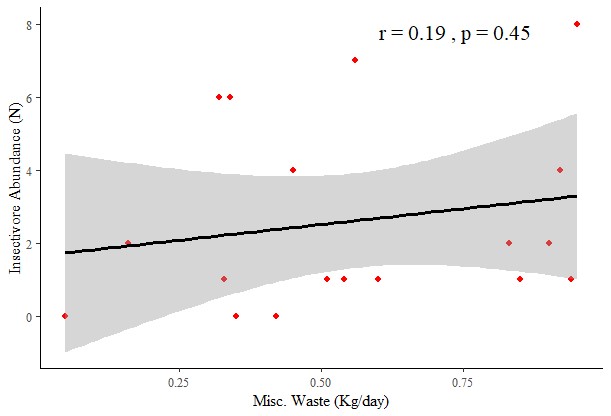


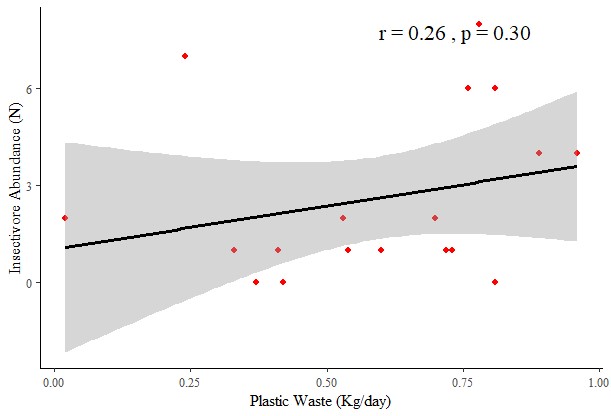


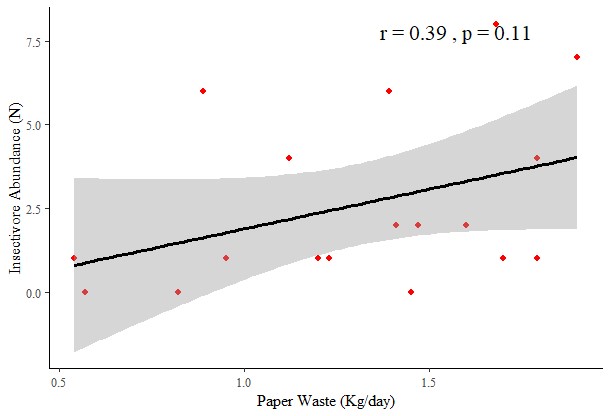


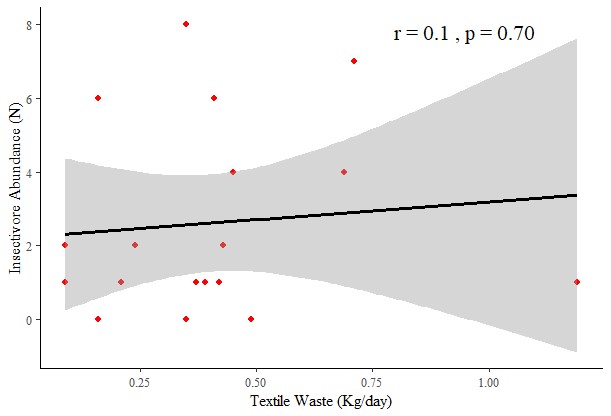


Appendix VIII: Relationship of insectivore abundance with various non-food waste generated within the urban area during November 2014.
